# Supplementary material
Source: publisher figshare collection journal article supplement (https://gsajournals.figshare.com/articles/dataset/_/13505709)
Supplement: Supplementary file 1 [file 1]

## Sheet: Sheet1
Table S1. Thomson et al.
Plate	Well	Chemical	Plate	Well	Chemical
PM01	A1	Negative control	PM02A	A1	Negative control
PM01	A2	L-arabinose	PM02A	A2	Chondroitin sulfate C
PM01	A3	N-acetyl-D-glucosamine	PM02A	A3	a-cyclodextrin
PM01	A4	D-saccharic acid	PM02A	A4	b-cyclodextrin
PM01	A5	Succinic acid	PM02A	A5	g-cyclodextrin
PM01	A6	D-galactose	PM02A	A6	Dextrin
PM01	A7	L-aspartic acid	PM02A	A7	Gelatin
PM01	A8	L-proline	PM02A	A8	Glycogen
PM01	A9	D-alanine	PM02A	A9	Inulin
PM01	A10	D-trehalose	PM02A	A10	Laminarin
PM01	A11	D-mannose	PM02A	A11	Mannan
PM01	A12	Dulcitol	PM02A	A12	Pectin
PM01	B1	D-serine	PM02A	B1	N-acetyl-D-galactosamine
PM01	B2	D-sorbitol	PM02A	B2	N-acetyl-neuraminic acid
PM01	B3	Glycerol	PM02A	B3	b-D-allose
PM01	B4	L-fucose	PM02A	B4	Amygdalin
PM01	B5	D-glucuronic acid	PM02A	B5	D-arabinose
PM01	B6	D-gluconic acid	PM02A	B6	D-arabitol
PM01	B7	D,L-a-glycerol-phosphate	PM02A	B7	L-arabitol
PM01	B8	D-xylose	PM02A	B8	Arbutin
PM01	B9	L-lactic acid	PM02A	B9	2-deoxy-D-ribose
PM01	B10	Formic acid	PM02A	B10	i-erythritol
PM01	B11	D-mannitol	PM02A	B11	D-fucose
PM01	B12	L-glutamic acid	PM02A	B12	3-0-b-D-galacto-pyranosyl-D-arabinose
PM01	C1	D-glucose-6-phosphate	PM02A	C1	Gentiobiose
PM01	C2	D-galactonic acid-g-lactone	PM02A	C2	L-glucose
PM01	C3	D,L-malic acid	PM02A	C3	Lactitol
PM01	C4	D-ribose	PM02A	C4	D-melezitose
PM01	C5	Tween 20	PM02A	C5	Malitol
PM01	C6	L-rhamnose	PM02A	C6	a-methyl-D-glucoside
PM01	C7	D-fructose	PM02A	C7	b-methyl-D-galactoside
PM01	C8	Acetic acid	PM02A	C8	3-methyl glucose
PM01	C9	a-D-glucose	PM02A	C9	b-methyl-D-glucuronic acid
PM01	C10	Maltose	PM02A	C10	a-methyl-D-mannoside
PM01	C11	D-melibiose	PM02A	C11	b-methyl-D-xyloside
PM01	C12	Thymidine	PM02A	C12	Palatinose
PM01	D1	L-asparagine	PM02A	D1	D-raffinose
PM01	D2	D-aspartic acid	PM02A	D2	Salicin
PM01	D3	D-glucosaminic acid	PM02A	D3	Sedoheptulosan
PM01	D4	1,2-propanediol	PM02A	D4	L-sorbose
PM01	D5	Tween 40	PM02A	D5	Stachyose
PM01	D6	a-keto-glutaric acid	PM02A	D6	D-tagatose
PM01	D7	a-keto-butyric acid	PM02A	D7	Turanose
PM01	D8	a-methyl-D-galactoside	PM02A	D8	Xylitol
PM01	D9	a-D-lactose	PM02A	D9	N-acetyl-D-glucosaminitol
PM01	D10	Lactulose	PM02A	D10	g-amino butyric acid
PM01	D11	Sucrose	PM02A	D11	d-amino valeric acid
PM01	D12	Uridine	PM02A	D12	Butyric acid
PM01	E1	L-glutamine	PM02A	E1	Capric acid
PM01	E2	M-tartaric acid	PM02A	E2	Caproic acid
PM01	E3	D-glucose-1-phosphate	PM02A	E3	Citraconic acid
PM01	E4	D-fructose-6-phosphate	PM02A	E4	Citramalic acid
PM01	E5	Tween 80	PM02A	E5	D-glucosamine
PM01	E6	a-hydroxy glutaric acid-g-lactone	PM02A	E6	2-hydroxy benzoic acid
PM01	E7	a-hydroxy butyric acid	PM02A	E7	4-hydroxy benzoic acid
PM01	E8	b-methyl-D-glucoside	PM02A	E8	b-hydroxy butyric acid
PM01	E9	Adonitol	PM02A	E9	g-hydroxy butyric acid
PM01	E10	Maltotriose	PM02A	E10	a-keto-valeric acid
PM01	E11	2-deoxy adenosine	PM02A	E11	Itaconic acid
PM01	E12	Adenosine	PM02A	E12	5-keto-D-gluconic acid
PM01	F1	Glycyl-L-aspartic acid	PM02A	F1	D-lactic acid methyl ester
PM01	F2	Citric acid	PM02A	F2	Malonic acid
PM01	F3	m-inositol	PM02A	F3	Melibionic acid
PM01	F4	D-threonine	PM02A	F4	Oxalic acid
PM01	F5	Fumaric acid	PM02A	F5	Oxalomalic acid
PM01	F6	Bromo succinic acid	PM02A	F6	Quinic acid
PM01	F7	Propionic acid	PM02A	F7	D-ribono-1,4-lactone
PM01	F8	Mucic acid	PM02A	F8	Sebacic acid
PM01	F9	Glycolic acid	PM02A	F9	Sorbic acid
PM01	F10	Glyoxylic acid	PM02A	F10	Succinamic acid
PM01	F11	D-cellobiose	PM02A	F11	D-tartaric acid
PM01	F12	Inosine	PM02A	F12	L-tartaric acid
PM01	G1	Glycyl-L-glutamic acid	PM02A	G1	Acetamide
PM01	G2	Tricarballylic acid	PM02A	G2	L-alaninamide
PM01	G3	L-serine	PM02A	G3	N-acetyl-L-glutamic acid
PM01	G4	L-threonine	PM02A	G4	L-arginine
PM01	G5	L-alanine	PM02A	G5	Glycine
PM01	G6	L-alanyl-glycine	PM02A	G6	L-histidine
PM01	G7	Acetoacetic acid	PM02A	G7	L-homoserine
PM01	G8	N-acetyl-b-D-mannosamine	PM02A	G8	Hydroxy-L-proline
PM01	G9	Mono methyl succinate	PM02A	G9	L-isoleucine
PM01	G10	Methyl pyruvate	PM02A	G10	L-leucine
PM01	G11	D-malic acid	PM02A	G11	L-lysine
PM01	G12	L-malic acid	PM02A	G12	L-methionine
PM01	H1	Glycyl-L-proline	PM02A	H1	L-ornithine
PM01	H2	p-hydroxy phenyl acetic acid	PM02A	H2	L-phenylalanine
PM01	H3	m-hydroxy phenyl acetic acid	PM02A	H3	L-pyroglutamic acid
PM01	H4	Tyramine	PM02A	H4	L-valine
PM01	H5	D-psicose	PM02A	H5	D,L-carnitine
PM01	H6	L-lyxose	PM02A	H6	Sec-butylamine
PM01	H7	Glucuronamide	PM02A	H7	D,L-octopamine
PM01	H8	Pyruvic acid	PM02A	H8	Putrescine
PM01	H9	L-galactonic-g-lactone	PM02A	H9	Dihydroxy acetone
PM01	H10	D-galactonuronic acid	PM02A	H10	2,3-butanediol
PM01	H11	Phenylethyl-amine	PM02A	H11	2,3-butanedione
PM01	H12	2-aminoethanol	PM02A	H12	3-hydroxy-2-butanone
Table S1. List of carbon sources included in phenotype microarray plates PM01 and PM02A
